# Supplementary material
Source: HighWire-hosted journal article supplement (https://molpharm.aspetjournals.org/highwire/filestream/82428/field_highwire_adjunct_files/0/Supplemental_112615.pdf)
Supplement: Supplemental_112615.pdf [file Supplemental_112615.pdf]

KE Weigl, G Conseil, AJ Rothnie, M Arama, Y Tsfadia, and SPC Cole *Molecular Pharmacology* MOL112615

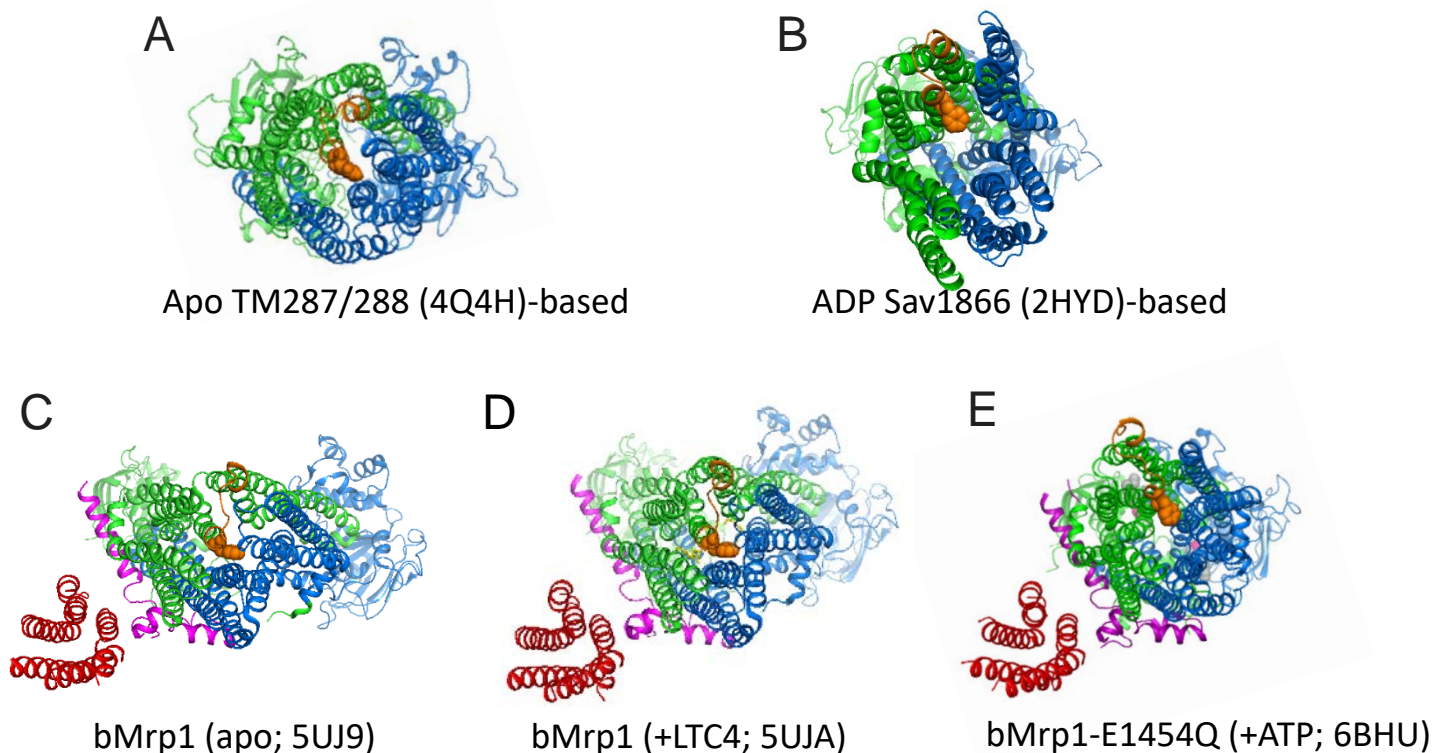

**Supplemental Fig. 1. Extracellular view of atomic homology models of human MRP1 and cryoEM-derived models of bovine Mrp1.**

Shown are full views of the extracellular face along the membrane normal of atomic homology models of human MRP1 derived using the crystal structure of *A*, TM287/288 (PDB: 4Q4H) as template; and *B*, Sav1866 (PDB: 2HYD) as template; and cryoEM structures of wild-type bovine Mrp1 *C*, in the absence of ATP and LTC<sub>4</sub> (PDB: 5UJ9); and *D*, bound to LTC<sub>4</sub> (PDB: 5UJA); and *E*, mutant, ATP-hydrolysis deficient, bovine Mrp1-E1454Q bound to ATP (PDB: 6BHU). A space-filling MRP1-Phe<sup>583</sup> and ECL5 are shown in *orange*. TMs 6-11 of MSD1 and NBD1 are shown in *green* and TM helices 12-17 of MSD2 and NBD2 are in *blue*. TMs 1-5 of MSD0 are in *red*, and the sequence connecting MSD0 to MSD1 (termed the 'lasso' motif) (Johnson & Chen, 2017) is shown in *magenta*.

KE Weigl, G Conseil, AJ Rothnie, M Arama, Y Tsfadia, and SPC Cole *Molecular Pharmacology* MOL112615

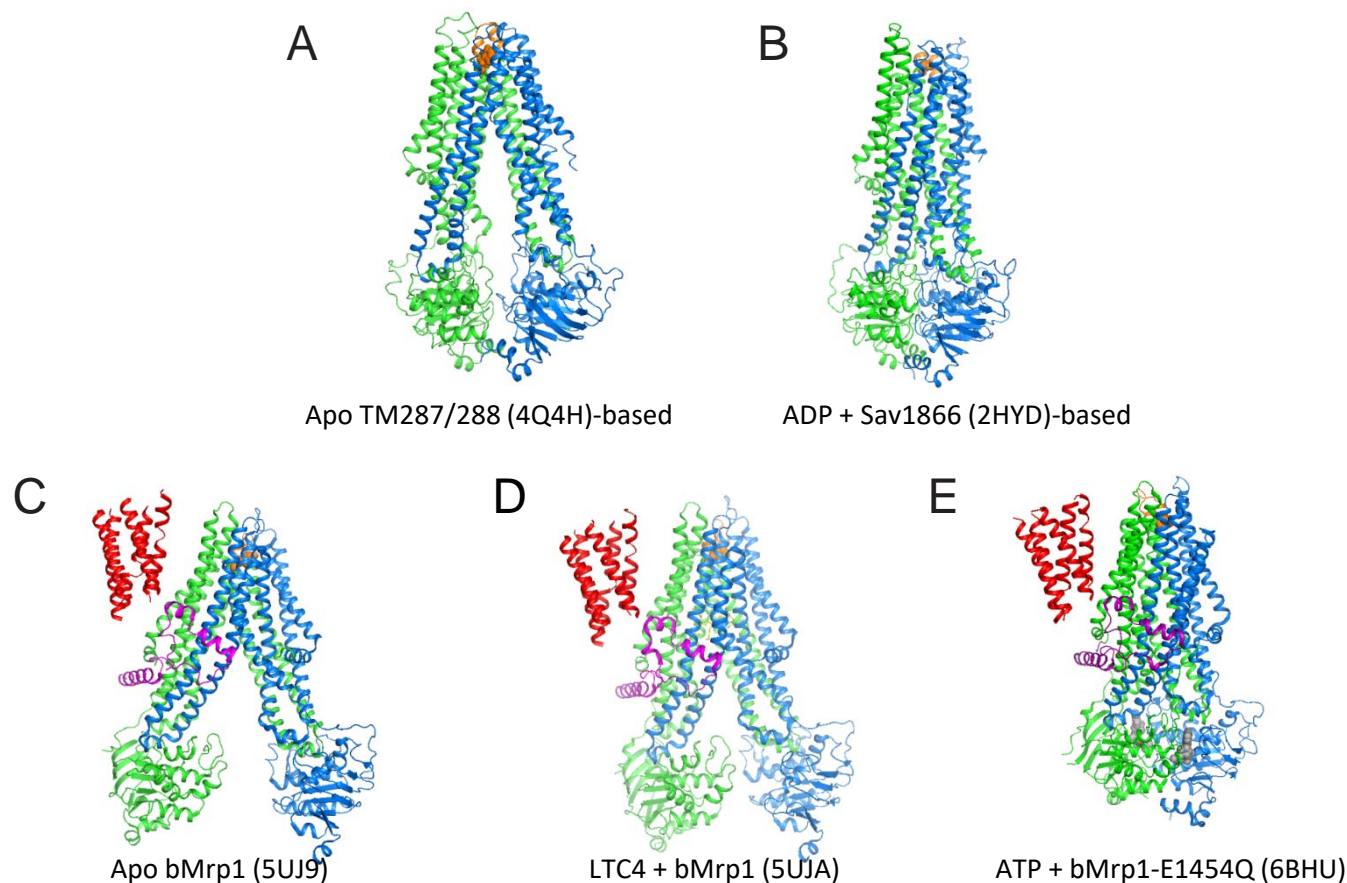

**Supplemental Fig. 2. Side views of atomic homology models of human MRP1 and cryoEM-derived models of bovine Mrp1.**

Shown are side views from within the plane of the membrane of atomic homology models of human MRP1 derived using the crystal structure of A, TM287/288 (PDB: 4Q4H) as template; and B, Sav1866 (PDB: 2HYD) as template; and cryoEM structures of wild-type bovine Mrp1 C, in the absence of ATP and LTC<sub>4</sub> (PDB: 5UJ9); and D, bound to LTC<sub>4</sub> (PDB: 5UJA); and E, mutant, ATP-hydrolysis deficient, bovine Mrp1-E1454Q bound to ATP (PDB: 6BHU). A space-filling MRP1-Phen<sup>583</sup> and ECL5 are shown in orange. TMs 6-11 of MSD1 and NBD1 are shown in green and TM helices 12-17 of MSD2 and NBD2 are in blue. TMs 1-5 of MSD0 are in red, and the sequence connecting MSD0 to MSD1 (termed the 'lasso' motif) (Johnson & Chen, 2017) is shown in magenta.
